# Supplementary material for: Improved early development of porcine cloned embryos by treatment with quisinostat, a potent histone deacetylase inhibitor
Source: PubMed Central journal article supplement — J Reprod Dev. 2018 Dec 27;65(2):103–12. doi: 10.1262/jrd.2018-098 (PMC6473109; doi:10.1262/jrd.2018-098), 2018-12-27

**Supplementary Fig. 1.** Porcine blastocysts derived from the control (A) and 100 nM JNJ treatment (B) groups visualized under a light microscope (original magnification 100×). Hoechst 33342 stained blastocysts derived from the control (a) and 100 nM JNJ treatment (b) groups visualized under UV light. Scale bar, 100  $\mu$ m.

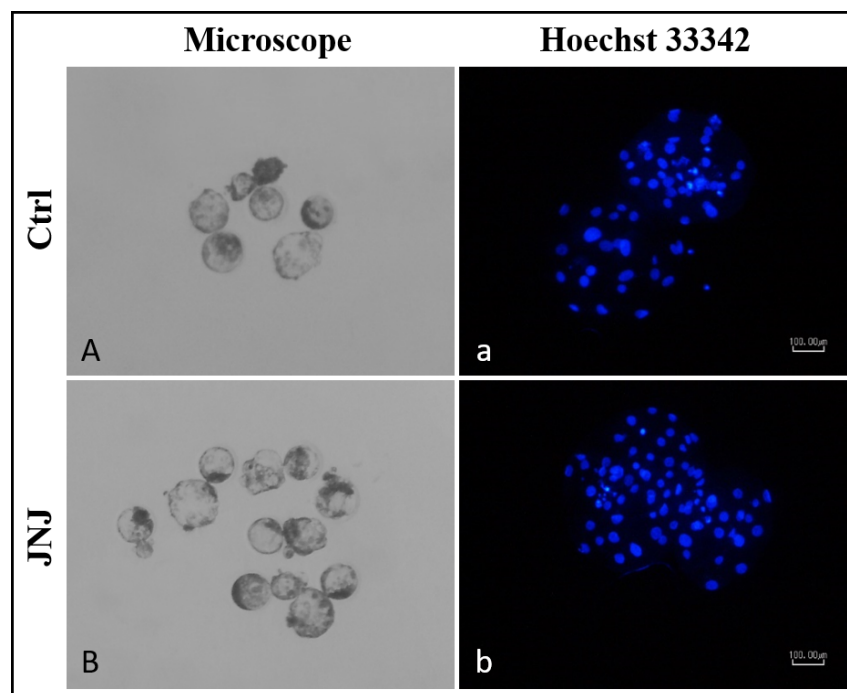

Supplement: jrd-65-103-s001.pdf [file jrd-65-103-s001.pdf]
